# Supplementary material for: Green synthesis of biomimetic CePO4:Tb nanostructures using the simplest morphology control
Source: Royal Society of Chemistry journal article supplement (doi:10.1039/c4ra10089a), 2014-09-30
Supplement: c4ra10089a1.pdf [file c4ra10089a1.pdf]

**Supplementary information**

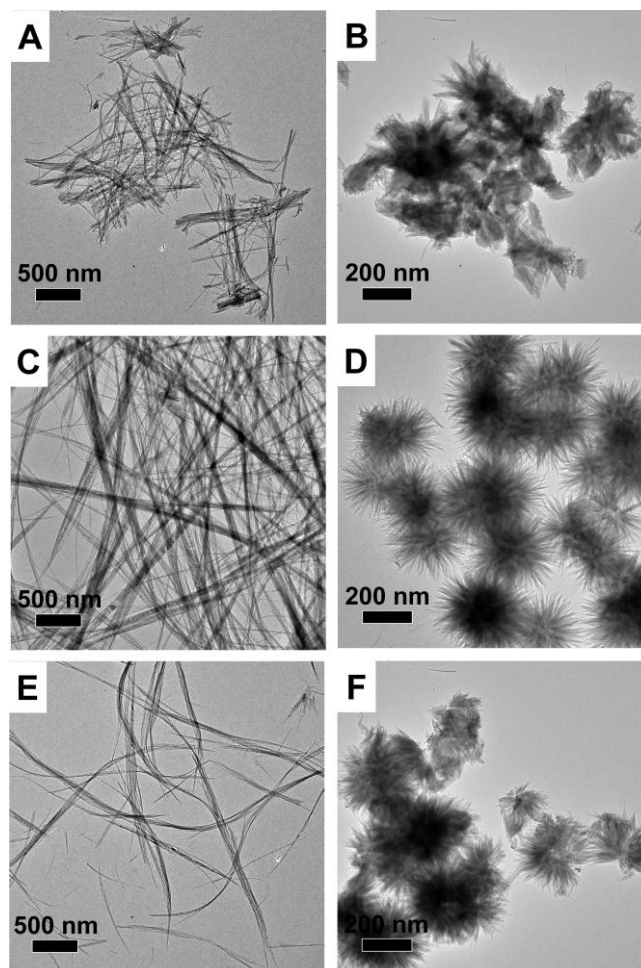

**Figure S1.** Nanowire/nanourchin formation properties in the function of Ce:PO<sub>4</sub> molar ratios of 1:1 (A, B), 1:2 (C, D) and 1:4 (E, F) by fixed cerium nitrate concentration.

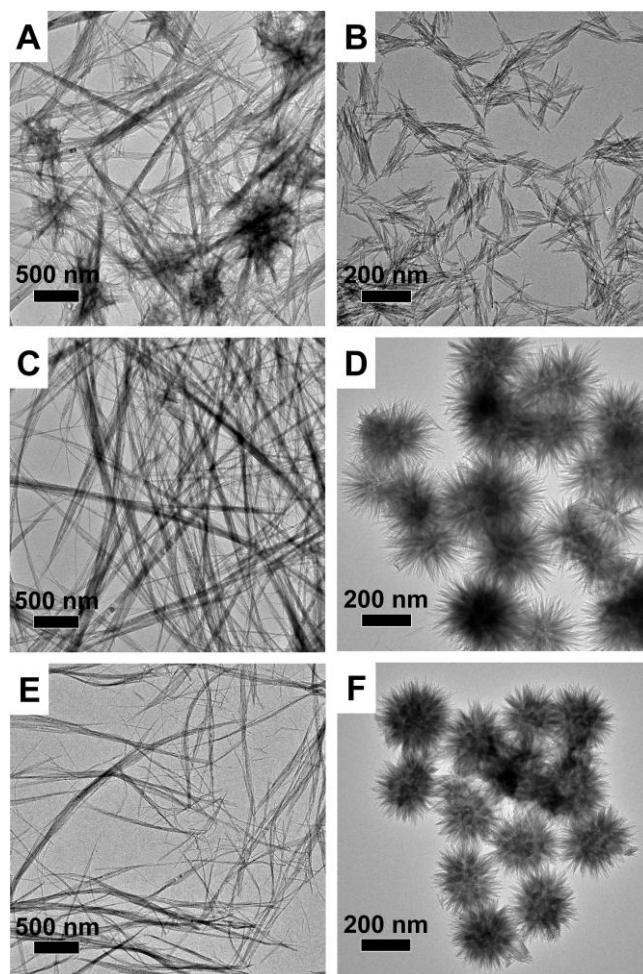

**Figure S2.** Nanowire/nanourchin formation properties in the function of Ce:PO<sub>4</sub> molar ratios of 1:1 (A, B), 1:2 (C, D) and 1:4 (E, F) by fixed phosphoric acid concentration.

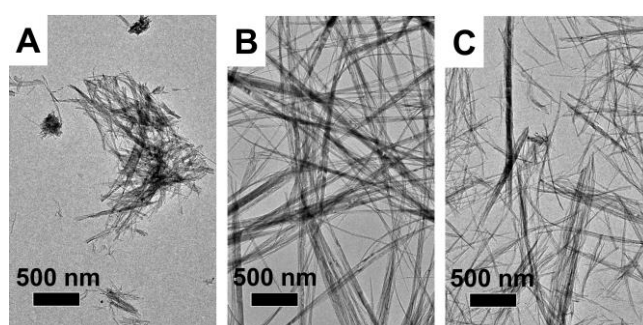

**Figure S3.** Time-dependent nanowire formation properties using synthesis times of 1 h (A), 3 h (B) and 6 h (C).

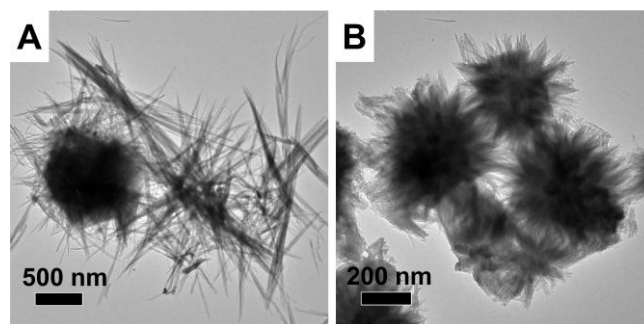

**Figure S4.** Reverse addition of precursor solutions in dropwise (A) and simultaneous (B) manner.
